# Supplementary material for: Ocean circulation causes the largest freshening event for 120 years in eastern subpolar North Atlantic
Source: PubMed Central journal article supplement (PMC6989661; doi:10.1038/s41467-020-14474-y), 2020-01-29
Supplement: 41467_2020_14474_MOESM2_ESM.pdf [file 41467_2020_14474_MOESM2_ESM.pdf]

## Reporting Summary

Nature Research wishes to improve the reproducibility of the work that we publish. This form provides structure for consistency and transparency in reporting. For further information on Nature Research policies, see [Authors & Referees](#) and the [Editorial Policy Checklist](#).

### Statistics

For all statistical analyses, confirm that the following items are present in the figure legend, table legend, main text, or Methods section.

n/a Confirmed

- The exact sample size ( $n$ ) for each experimental group/condition, given as a discrete number and unit of measurement
- A statement on whether measurements were taken from distinct samples or whether the same sample was measured repeatedly
- The statistical test(s) used AND whether they are one- or two-sided  
*Only common tests should be described solely by name; describe more complex techniques in the Methods section.*
- A description of all covariates tested
- A description of any assumptions or corrections, such as tests of normality and adjustment for multiple comparisons
- A full description of the statistical parameters including central tendency (e.g. means) or other basic estimates (e.g. regression coefficient) AND variation (e.g. standard deviation) or associated estimates of uncertainty (e.g. confidence intervals)
- For null hypothesis testing, the test statistic (e.g.  $F$ ,  $t$ ,  $r$ ) with confidence intervals, effect sizes, degrees of freedom and  $P$  value noted  
*Give  $P$  values as exact values whenever suitable.*
- For Bayesian analysis, information on the choice of priors and Markov chain Monte Carlo settings
- For hierarchical and complex designs, identification of the appropriate level for tests and full reporting of outcomes
- Estimates of effect sizes (e.g. Cohen's  $d$ , Pearson's  $r$ ), indicating how they were calculated

*Our web collection on [statistics for biologists](#) contains articles on many of the points above.*

### Software and code

Policy information about [availability of computer code](#)

Data collection

no software

Data analysis

Matlab tools

For manuscripts utilizing custom algorithms or software that are central to the research but not yet described in published literature, software must be made available to editors/reviewers. We strongly encourage code deposition in a community repository (e.g. GitHub). See the Nature Research [guidelines for submitting code & software](#) for further information.

### Data

Policy information about [availability of data](#)

All manuscripts must include a [data availability statement](#). This statement should provide the following information, where applicable:

- Accession codes, unique identifiers, or web links for publicly available datasets
- A list of figures that have associated raw data
- A description of any restrictions on data availability

All data used in this analysis are available as follows. The EN4 data set (ref74 version 4.2.0) with the bias correction of ref 75 was obtained from <https://www.metoffice.gov.uk/hadobs/en4/>, downloaded on the 1st of November, 2017.

The time series of salinity of the upper ocean (Faroe-Shetland Channel, Rockall Trough, Faroe Bank Channel, Iceland Basin, shown in Fig. 4a) were obtained from ICES (<https://ocean.ices.dk/iroc/>, downloaded November 2018). The surface salinity data (Fig. 4c) are made freely available by the French Sea Surface Salinity Observation Service (<http://www.legos.obs-mip.fr/observations/sss/>) (downloaded November 2018), <https://dx.doi.org/10.6096/SSS-BIN-NASG>. Time series of annual salinity anomalies of the upper ocean (0-500m) in the Labrador Sea (Fig. 4b) are available on request from Igor.Yashayaev@dfo-mpo.gc.ca. The anomalies are relative to a mean seasonal cycle computed at a high-resolution topographically-adjusted spatial grid, and averaged over the whole Labrador Sea. Salinity data at OSNAP mooring M4 in the Iceland Basin (58.0°N, 21.1°W, Fig. 4e) are available at <https://doi.org/10.7924/r42n52w51>.

The Extended Ellett Line programme consists of repeat hydrographic sections along a line from Iceland to Scotland12 (Figs. 1b, 5); data are available from <https://www.bodc.ac.uk>. The OVIDE8 programme consists of repeat hydrographic sections along a line from Greenland to Portugal (Figs. 1b, 5). Data from the 2014

section are available from doi:10.17882/52153 (<https://www.seanoe.org/data/00410/52153/>) and OVIDE-BOCATS 2016 on request from pascal.lherminier@ifremer.fr, see <https://archimer.ifremer.fr/doc/00480/59190/61877.pdf>. This analysis used E.U. Copernicus Marine Service Information: ARMOR3D fields available through MULTIOBS\_GLO\_PHY\_REP\_015\_002 product and DUACS DT2018 through SEALEVEL\_GLO\_PHY\_L4\_REP\_OBSERVATIONS\_008\_047 product.

## Field-specific reporting

Please select the one below that is the best fit for your research. If you are not sure, read the appropriate sections before making your selection.

Life sciences       Behavioural & social sciences       Ecological, evolutionary & environmental sciences

For a reference copy of the document with all sections, see [nature.com/documents/nr-reporting-summary-flat.pdf](https://www.nature.com/documents/nr-reporting-summary-flat.pdf)

## Ecological, evolutionary & environmental sciences study design

All studies must disclose on these points even when the disclosure is negative.

|                                   |                                                                                                               |
|-----------------------------------|---------------------------------------------------------------------------------------------------------------|
| Study description                 | analysis of ocean and atmospheric data                                                                        |
| Research sample                   | Data sets of physical properties: temperature, pressure, salinity, net precipitation, wind                    |
| Sampling strategy                 | all available data were used                                                                                  |
| Data collection                   | no new data collection                                                                                        |
| Timing and spatial scale          | Data from 1950 to 2016, over the North Atlantic ocean between 30-65N                                          |
| Data exclusions                   | none                                                                                                          |
| Reproducibility                   | We make use of available data and explain what we do - anyone could reproduce our results from the same data. |
| Randomization                     | n/a                                                                                                           |
| Blinding                          | n/a                                                                                                           |
| Did the study involve field work? | <input type="checkbox"/> Yes <input checked="" type="checkbox"/> No                                           |

## Reporting for specific materials, systems and methods

We require information from authors about some types of materials, experimental systems and methods used in many studies. Here, indicate whether each material, system or method listed is relevant to your study. If you are not sure if a list item applies to your research, read the appropriate section before selecting a response.

### Materials & experimental systems

- |                                     |                                                      |
|-------------------------------------|------------------------------------------------------|
| n/a                                 | Involvement in the study                             |
| <input checked="" type="checkbox"/> | <input type="checkbox"/> Antibodies                  |
| <input checked="" type="checkbox"/> | <input type="checkbox"/> Eukaryotic cell lines       |
| <input checked="" type="checkbox"/> | <input type="checkbox"/> Palaeontology               |
| <input checked="" type="checkbox"/> | <input type="checkbox"/> Animals and other organisms |
| <input checked="" type="checkbox"/> | <input type="checkbox"/> Human research participants |
| <input checked="" type="checkbox"/> | <input type="checkbox"/> Clinical data               |

### Methods

- |                                     |                                                 |
|-------------------------------------|-------------------------------------------------|
| n/a                                 | Involvement in the study                        |
| <input checked="" type="checkbox"/> | <input type="checkbox"/> ChIP-seq               |
| <input checked="" type="checkbox"/> | <input type="checkbox"/> Flow cytometry         |
| <input checked="" type="checkbox"/> | <input type="checkbox"/> MRI-based neuroimaging |
